# Supplementary material for: Decoding the Effects of High Hydrostatic Pressure and High-Temperature Short-Time Sterilization on the Volatile Aroma Profile of Red Raspberry Juice
Source: MDPI journal article supplement (doi:10.3390/foods13101574), 2024-05-18
Supplement: s1 [file s1]

## Supplementary materials

**Table S1 The 12 aroma-active compounds in red raspberry juices after different sterilization treatments**

| no. | compound <sup>a</sup> | CAS Registry No. | LRI <sup>b</sup> |        | odor description <sup>c</sup> | I methods <sup>d</sup> | concentration (µg/kg) |                |                |
|-----|-----------------------|------------------|------------------|--------|-------------------------------|------------------------|-----------------------|----------------|----------------|
|     |                       |                  | DB-5             | DB-WAX |                               |                        | Fresh                 | HHP            | HTST           |
| 1   | hexanal               | 66-25-1          | -                | --     | grass, cucumber, fat          | MS, O, S               | 37.55 ± 2.14          | 31.21 ± 1.46   | 31.57 ± 1.38   |
| 2   | (Z)-3-hexenal         | 6789-80-6        | 804              | 1148   | grass, leaf, sweat            | MS, LRI, O, S          | 22.98 ± 1.79          | 19.21 ± 1.08   | 16.99 ± 0.33   |
| 3   | eucalyptol            | 470-82-6         | 1033             | 1211   | rosin, mint, camphor          | MS, LRI, O, S          | 10.15 ± 1.21          | 10.87 ± 0.97   | 10.06 ± 1.10   |
| 4   | (E)-2-hexenal         | 6728-26-3        | 856              | 1217   | leaf, vegetable, earth        | MS, LRI, O, S          | 179.85 ± 7.53         | 235.57 ± 11.53 | 291.77 ± 14.98 |
| 5   | (Z)-3-hexen-1-ol      | 928-96-1         | -                | 1385   | grass, sweat                  | MS, LRI, O, S          | 2.03 ± 0.13           | 2.20 ± 0.19    | 2.01 ± 0.05    |
| 6   | 1-octen-3-ol          | 3391-86-4        | 978              | 1453   | soap, mushroom, milk          | MS, LRI, O, S          | 2.09 ± 0.07           | 2.02 ± 0.24    | 1.57 ± 0.12    |
| 7   | theaspirane           | 36431-72-8       | 1296             | 1533   | tea, peel                     | MS, LRI, O, S          | 3.05 ± 0.17           | 4.63 ± 0.36    | 3.88 ± 0.26    |
| 8   | linalool              | 78-70-6          | -                | 1550   | passion fruit, flower         | MS, LRI, O, S          | 17.09 ± 1.11          | 15.14 ± 2.45   | 8.92 ± 1.20    |
| 9   | damascenone           | 23696-85-7       |                  | 1818   | sweet, rose, honey            | MS, LRI, O, S          | 5.27 ± 0.70           | 8.92 ± 1.51    | 10.22 ± 0.52   |
| 10  | dihydro-β-ionone      | 17283-81-7       | 1431             | 1836   | sweet, violet, wood           | MS, LRI, O, S          | 1.47 ± 0.24           | 1.74 ± 0.25    | 1.81 ± 0.22    |
| 11  | α-ionone              | 127-41-3         | 1426             | 1851   | flower, violet, wood          | MS, LRI, O, S          | 11.49 ± 1.52          | 8.73 ± 1.63    | 5.65 ± 0.7     |
| 12  | β-ionone              | 79-77-6          | 1483             | 1937   | violet, flower, raspberry     | MS, LRI, O, S          | 87.2 ± 4.43           | 66.55 ± 4.65   | 85.82 ± 7.43   |

<sup>a</sup> The 12 volatile compounds were identified as major aroma-active compound in our previous work<sup>[9]</sup>.

<sup>b</sup> Retention indices on DB-5 and DB-Wax columns were determined as described<sup>[9]</sup>.

<sup>c</sup> Odor description perceived by the judges during GC-O-MS analysis.

<sup>d</sup> MS, identified by MS spectra; LRI, identified by comparison of their LRI on two columns (DB-5 and DB-Wax) with published data; O, identified by comparison of their odor description with the authentic compounds via GC-O-MS; S, identified by comparison to standards.
